# Supplementary material
Source: HighWire-hosted journal article supplement (https://www.cmaj.ca/highwire/filestream/58942/field_highwire_adjunct_files/1/survive-vanwal-2-at.pdf)
Supplement: survive-vanwal-2-at.pdf [file survive-vanwal-2-at.pdf]

1 **Appendix 2 (as supplied by the authors):** Independent association of study year and  
 2 patient characteristics on risk of death in hospital and after discharge from hospital.  
 3

| Factor                           | Value    | Death In Hospital |              | Death Post Discharge* |            |
|----------------------------------|----------|-------------------|--------------|-----------------------|------------|
|                                  |          | Adj OR            | 95% CI       | Adj OR                | 95% CI     |
| Intercept                        |          | -                 | -            | -                     | -          |
| Year                             | 1994     | -                 | -            | -                     | -          |
|                                  | 1999     | 0.93              | 0.91, 0.95   | 0.92                  | 0.91, 0.94 |
|                                  | 2004     | 0.85              | 0.83, 0.87   | 0.91                  | 0.90, 0.93 |
|                                  | 2009     | 0.76              | 0.74, 0.77   | 0.79                  | 0.78, 0.81 |
| Patient Age                      | 20-25    | -                 | -            | -                     | -          |
|                                  | 25-29    | 0.97              | 0.8, 1.17    | 1.17                  | 1.03, 1.33 |
|                                  | 30-34    | 1.15              | 0.97, 1.37   | 1.51                  | 1.34, 1.69 |
|                                  | 35-39    | 1.40              | 1.19, 1.65   | 2.29                  | 2.05, 2.56 |
|                                  | 40-44    | 1.82              | 1.56, 2.12   | 3.25                  | 2.92, 3.61 |
|                                  | 44-49    | 2.14              | 1.85, 2.49   | 3.99                  | 3.59, 4.42 |
|                                  | 50-55    | 2.40              | 2.07, 2.78   | 4.95                  | 4.47, 5.49 |
|                                  | 55-59    | 2.88              | 2.49, 3.33   | 5.67                  | 5.12, 6.28 |
|                                  | 60-64    | 3.31              | 2.86, 3.82   | 6.73                  | 6.09, 7.45 |
|                                  | 65-69    | 3.96              | 3.43, 4.57   | 7.78                  | 7.03, 8.60 |
|                                  | 70-75    | 4.56              | 3.95, 5.25   | 9.14                  | 8.27, 10.1 |
|                                  | 75-79    | 5.42              | 4.71, 6.25   | 11.1                  | 10.0, 12.3 |
|                                  | 80-84    | 6.47              | 5.61, 7.46   | 14.1                  | 12.8, 15.6 |
|                                  | 85-89    | 7.69              | 6.67, 8.86   | 19.0                  | 17.2, 21.0 |
|                                  | 90-94    | 10.4              | 8.99, 11.97  | 29.4                  | 26.5, 32.5 |
|                                  | 95+      | 15.0              | 12.91, 17.36 | 50.1                  | 45.0, 55.8 |
| Female                           |          | 1.18              | 1.16, 1.19   | 1.24                  | 1.23, 1.26 |
| Charlson Score                   | 0        | -                 | -            | -                     | -          |
|                                  | 1-2      | 3.45              | 3.36, 3.53   | 2.57                  | 2.53, 2.61 |
|                                  | 3-4      | 4.89              | 4.76, 5.02   | 4.18                  | 4.11, 4.26 |
|                                  | 5+       | 11.9              | 11.62, 12.22 | 14.8                  | 14.6, 15.0 |
| Elective Admission               |          | 0.42              | 0.41, 0.44   | 0.62                  | 0.61, 0.63 |
| Brought to Hospital by Ambulance |          | 2.63              | 2.59, 2.68   | 1.29                  | 1.28, 1.31 |
| Admitting Service                | Medicine | -                 | -            | -                     | -          |
|                                  | ObsGyne  | 0.11              | 0.1, 0.13    | 0.24                  | 0.22, 0.25 |
|                                  | Surgical | 0.63              | 0.62, 0.65   | 0.65                  | 0.64, 0.66 |

4 \* this model only included patient who were discharged alive from hospital with the  
 5 outcome being death within 1 year of admission date.
